# Supplementary material for: Synthesis of flowerlike carbon nanosheets from hydrothermally carbonized glucose: an in situ self-generating template strategy
Source: Royal Society of Chemistry journal article supplement (doi:10.1039/c9ra08196h), 2019-01-01
Supplement: c9ra08196h1.pdf [file c9ra08196h1.pdf]

## Support Information

### Synthesis of flowerlike carbon nanosheets from hydrothermally carbonized glucose: An in situ self-generating template strategy

Yun Chen, Wenge Qiu, Jiayuan Sun, Shining Li, Guangmei Bai, Shenghua Li, Chenghui Sun, Siping Pang

#### Additional Figures and Data

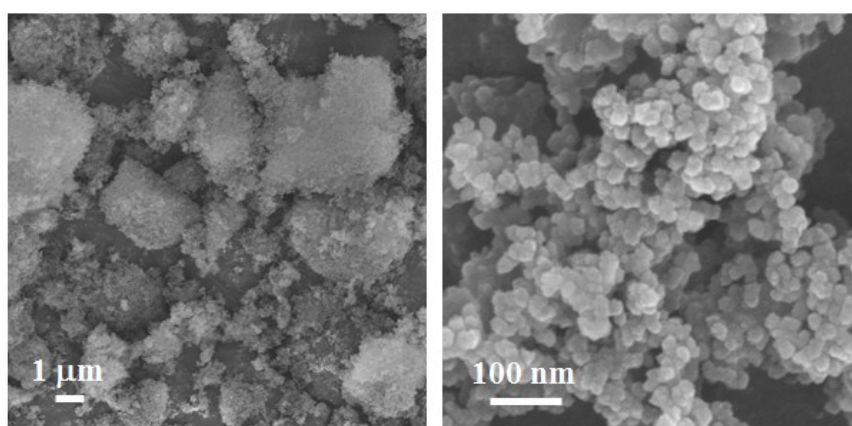

Fig. S1 SEM images of raw SiO<sub>2</sub> powder at different magnifications.

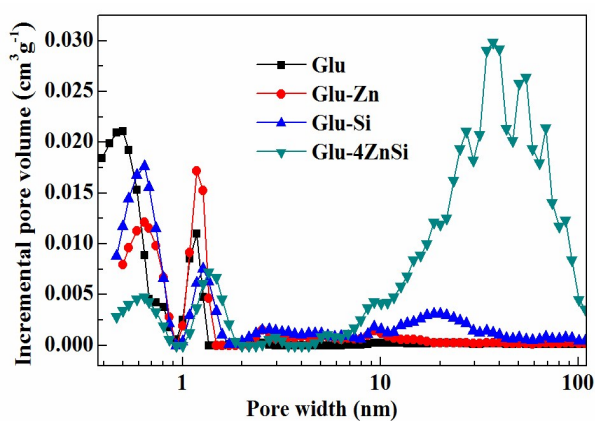

Fig. S2 Pore size distributions (PSD) of the resultant carbons.

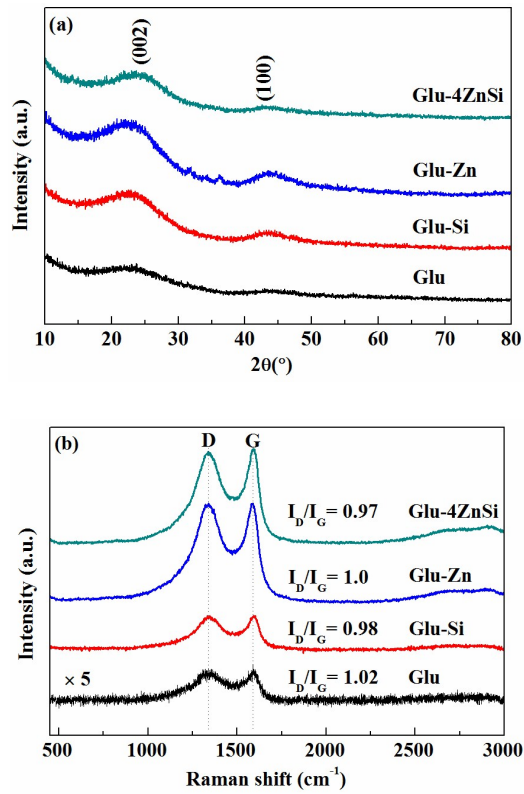

Fig. S3 XRD patterns (a) and Raman spectra (b) of the resultant carbon samples.

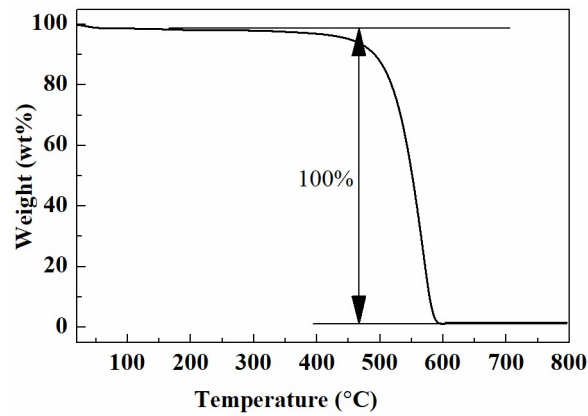

Fig. S4 TG profile of the Glu-4ZnSi sample.

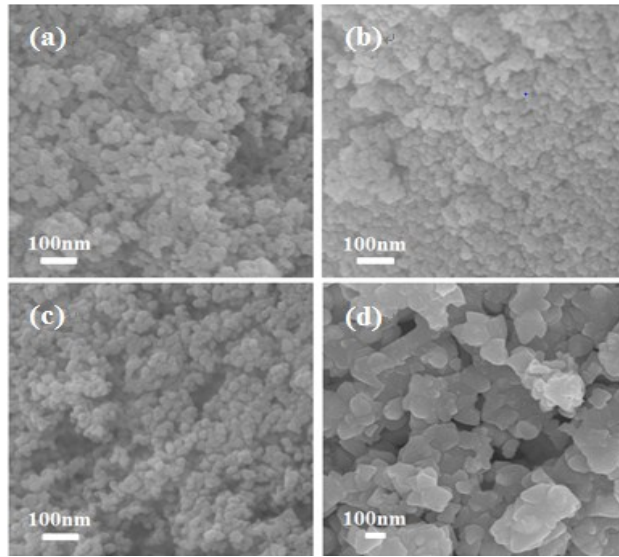

**Fig. S5** SEM images of HT-Si (a), HT-Si-ZnCl<sub>2</sub> (b), HT-Si-Zn(NO<sub>3</sub>)<sub>2</sub> (c), and Zn(CH<sub>3</sub>COO)<sub>2</sub> (d) samples.

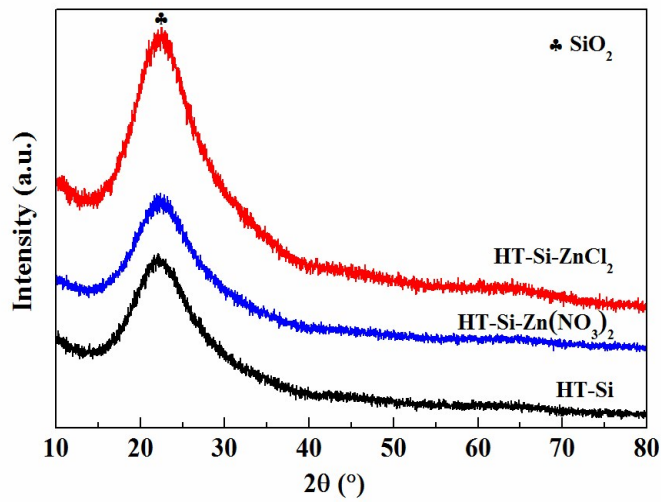

**Fig.S6** X-ray diffraction patterns of HT-Si, HT-Si-Zn(NO<sub>3</sub>)<sub>2</sub> and HT-Si-ZnCl<sub>2</sub>.

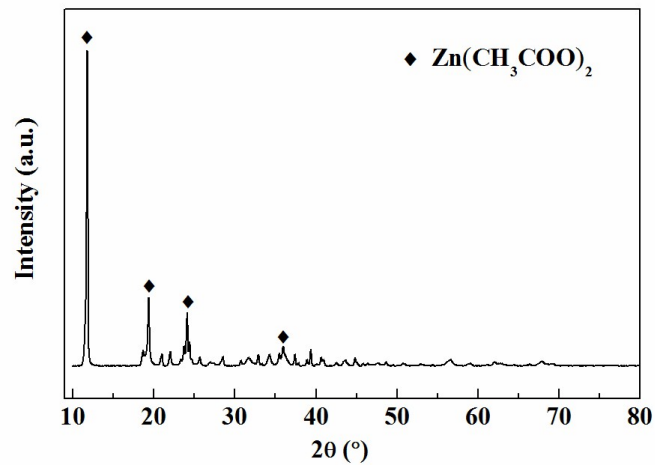

**Fig. S7** X-ray diffraction pattern of the Zn(CH<sub>3</sub>COO)<sub>2</sub> sample.

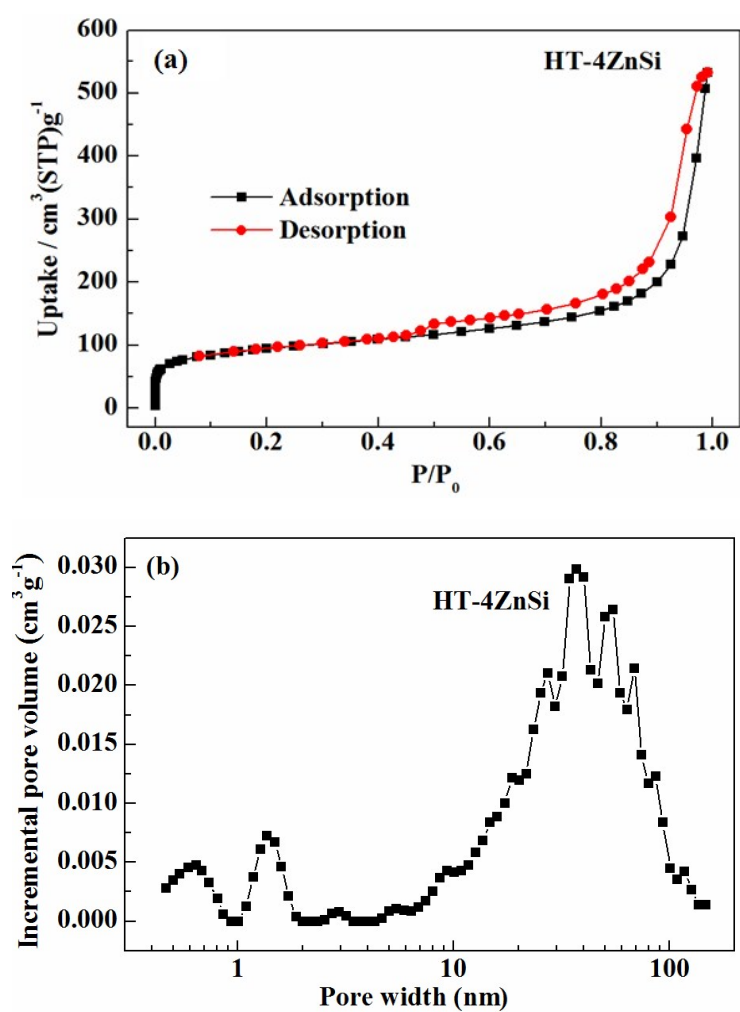

**Fig. S8** Nitrogen sorption/desorption isotherms (a) and pore size distributions (b) of HT-4ZnSi sample at 77K.

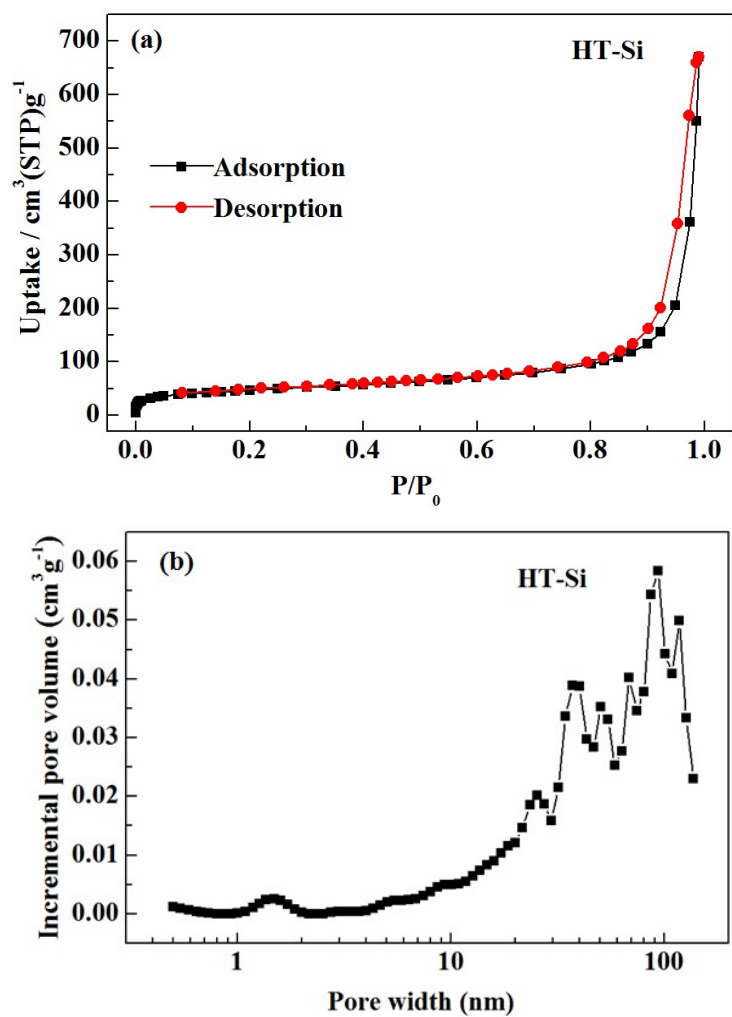

Fig. S9 Nitrogen sorption/desorption isotherms (a) and pore size distributions (b) of HT-Si sample at 77K.

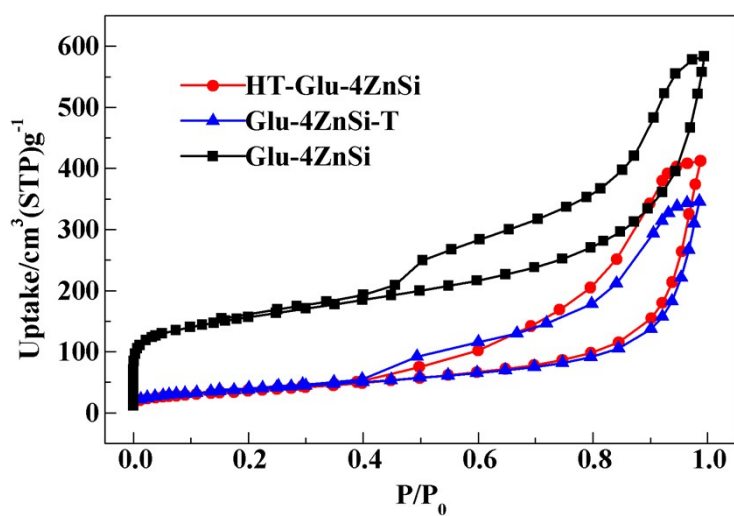

Fig. S10 Nitrogen sorption/desorption isotherms of HT-Glu-4ZnSi, Glu-4ZnSi-T and Glu-4ZnSi samples at 77K.

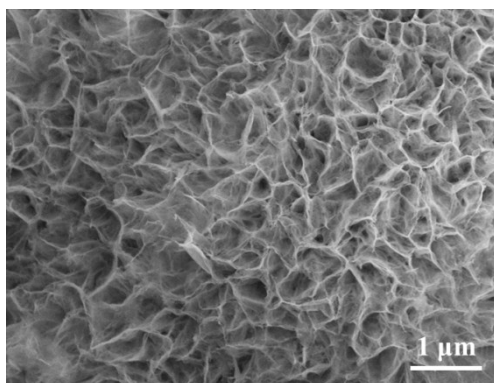

**Fig. S11** SEM image of the Glu-4ZnSi-T sample after calcinating at 800 °C in air flow.

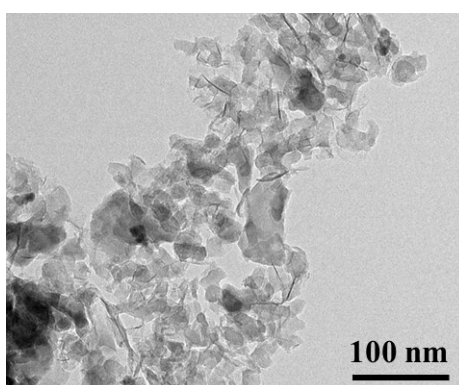

**Fig. S12** TEM image of the Glu-4ZnSi-T sample after calcinating at 800 °C in air flow.

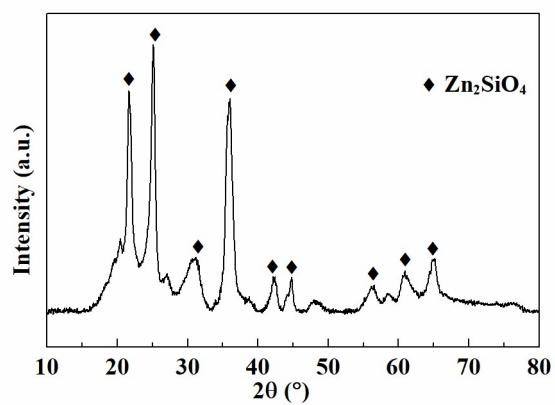

**Fig. S13** XRD pattern of the Glu-4ZnSi-T sample after calcinating at 800 °C in air flow.

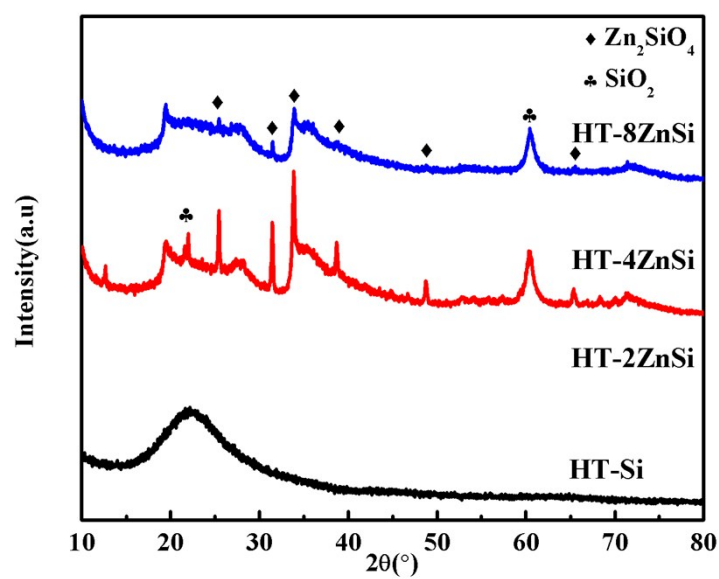

**Fig. S14** X-ray diffraction patterns of various HT-ZnSi samples with different Zn/Si ratios.

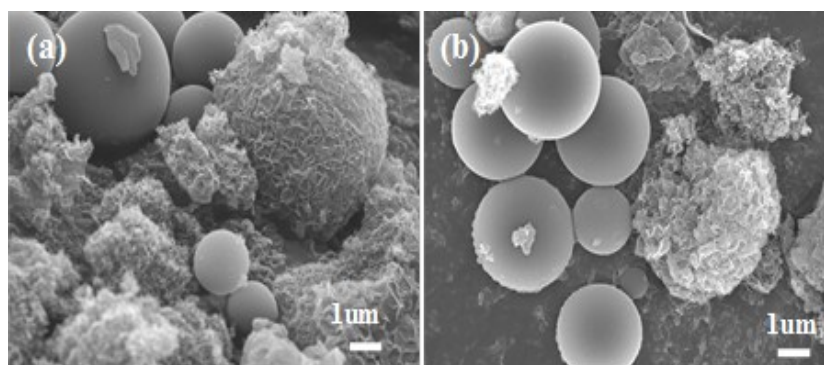

**Fig. S15** SEM images of the carbon samples, which were prepared using HT-4ZnSi as the hard template with the glucose concentrations of 0.2 (a) and 0.4 mol/L (b), respectively.

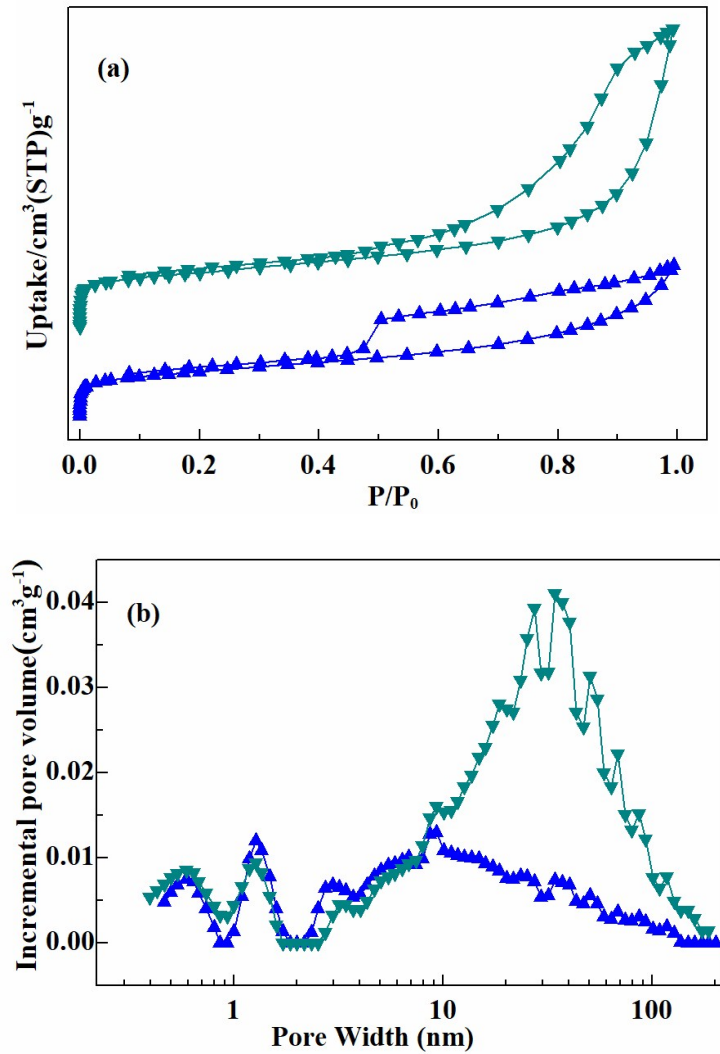

**Fig. S16** Nitrogen adsorption/desorption isotherms (a) and pore size distributions (b)) of the resultant carbon nanosheets, which were prepared by the *in situ* self-generating template process with the glucose concentrations of 0.8 (blue) and 1.6 mol/L (green), respectively.

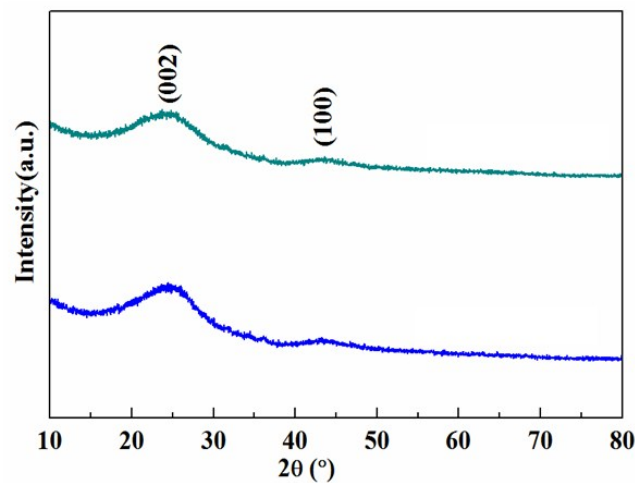

**Fig. S17** X-ray diffraction patterns of the resultant carbons, which were prepared by the *in situ*



self-generating template process with the glucose concentrations of 0.8 (blue) and 1.6 mol/L (green), respectively.

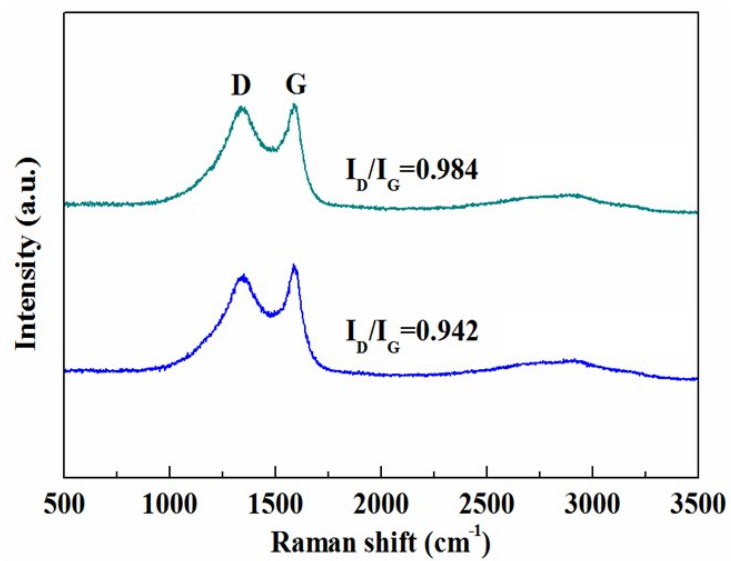

**Fig. S18** Raman spectra of the resultant carbons, which were prepared by the *in situ* self-generating template process with the glucose concentrations of 0.8 (blue) and 1.6 mol/L (green), respectively.

**Table S1** Yield and elemental analysis data of the carbon materials.

| Samples   | Yield<br>(wt %) | C<br>(wt %) | H<br>(wt %) | O<br>(wt %)* |
|-----------|-----------------|-------------|-------------|--------------|
| Glu       | 17              | 88.2        | 2.3         | 9.5          |
| Glu-Zn    | 9               | 88.4        | 1.8         | 9.8          |
| Glu-Si    | 26              | 88.1        | 2.1         | 9.8          |
| Glu-4ZnSi | 14              | 84.2        | 2.2         | 13.6         |

\* Oxygen content was calculated according to the data of carbon and hydrogen atoms.

**Table S2** Textural and structural properties of HT-4ZnSi, HT-Glu-4ZnSi, and Glu-4ZnSi-T.

| Samples      | $S_{\text{BET}}/\text{m}^2 \text{g}^{-1}$ | $S_{\text{mic}}/\text{m}^2 \text{g}^{-1}$ | $V_{\text{mic}}/V_{\text{total}}$ | $V_{\text{total}}/\text{cm}^3 \text{g}^{-1}$ |
|--------------|-------------------------------------------|-------------------------------------------|-----------------------------------|----------------------------------------------|
| HT-4ZnSi     | 279                                       | 91                                        | 0.06                              | 0.72                                         |
| HT-Glu-4ZnSi | 133                                       | -                                         | -                                 | 0.63                                         |
| Glu-4ZnSi-T  | 140                                       | 3.5                                       | 0.001                             | 0.54                                         |

**Table S3** Textural and structural properties of HT-Si and two carbon nanosheet samples.

| Samples    | $S_{\text{BET}}/\text{m}^2 \text{g}^{-1}$ | $S_{\text{micro}}/\text{m}^2 \text{g}^{-1}$ | $V_{\text{micro}}/V_{\text{total}}$ | $V_{\text{total}}/\text{cm}^3 \text{g}^{-1}$ |
|------------|-------------------------------------------|---------------------------------------------|-------------------------------------|----------------------------------------------|
| HT-Si      | 169                                       | 41                                          | 0.61                                | 1.03                                         |
| Glu-4ZnSi* | 485                                       | 167                                         | 0.10                                | 0.69                                         |
| Glu-4ZnSi# | 591                                       | 236                                         | 0.07                                | 1.34                                         |

\* The carbon sample was prepared by the *in situ* self-generating template process with the glucose concentration of 0.8 mol/L; # The carbon sample was prepared by the *in situ* self-generating template process with the glucose concentration of 1.6 mol/L.

**Table S4** Average Pd particle diameters and palladium dispersities of Pd/Glu-4ZnSi and Pd/C determined by CO chemisorption data.

| Samples      | Metal dispersion<br>(%) | Metallic surface area        |                             | Active particle<br>diameter (nm) |
|--------------|-------------------------|------------------------------|-----------------------------|----------------------------------|
|              |                         | $\text{m}^2/\text{g sample}$ | $\text{m}^2/\text{g metal}$ |                                  |
| Pd/Glu-4ZnSi | 45.7                    | 2.0                          | 201.2                       | 2.4                              |
| Pd/C         | 34.4                    | 1.5                          | 151.6                       | 3.2                              |
